# Supplementary material for: Carbonic Anhydrase Enhanced UV-Crosslinked PEG-DA/PEO Extruded Hydrogel Flexible Filaments and Durable Grids for CO2 Capture
Source: MDPI journal article supplement (doi:10.3390/gels9040341), 2023-04-16
Supplement: s1 [file s1]

# **Carbonic Anhydrase Enhanced UV-Crosslinked PEG-DA/PEO Extruded Hydrogel Flexible Filaments and Durable Grids for CO<sub>2</sub> Capture**

**Jialong Shen, Sen Zhang, Xiaomeng Fang\* and Sonja Salmon\***

Department of Textile Engineering, Chemistry and Science, Wilson College of Textiles, North Carolina State University, Raleigh, NC 27695-8301, USA; jshen3@ncsu.edu (J.S.); szhang53@ncsu.edu (S.Z.)

\*Correspondence: xfang3@ncsu.edu (X.F.); sisalmon@ncsu.edu (S.S.)

Supplementary Information

Contains:

2 Figures and 2 Tables

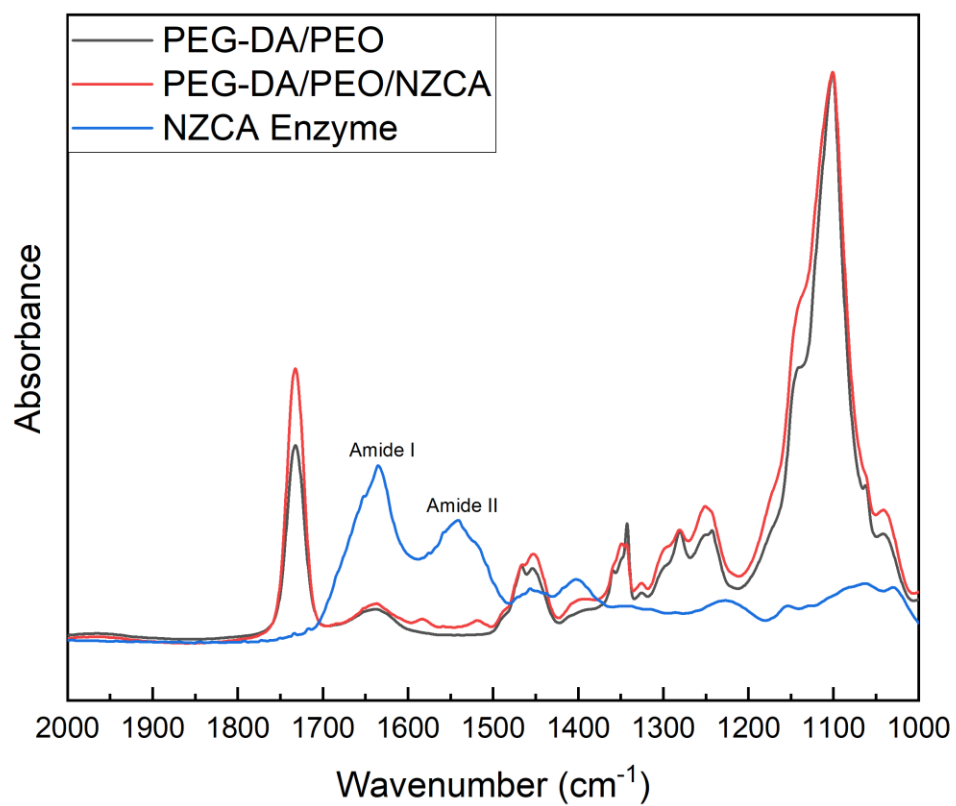

**Figure S1.** FTIR spectra of PEG-DA/PEO IPNH, PEG-DA/PEO IPNH with entrapped NZCA enzyme, and NZCA enzyme.

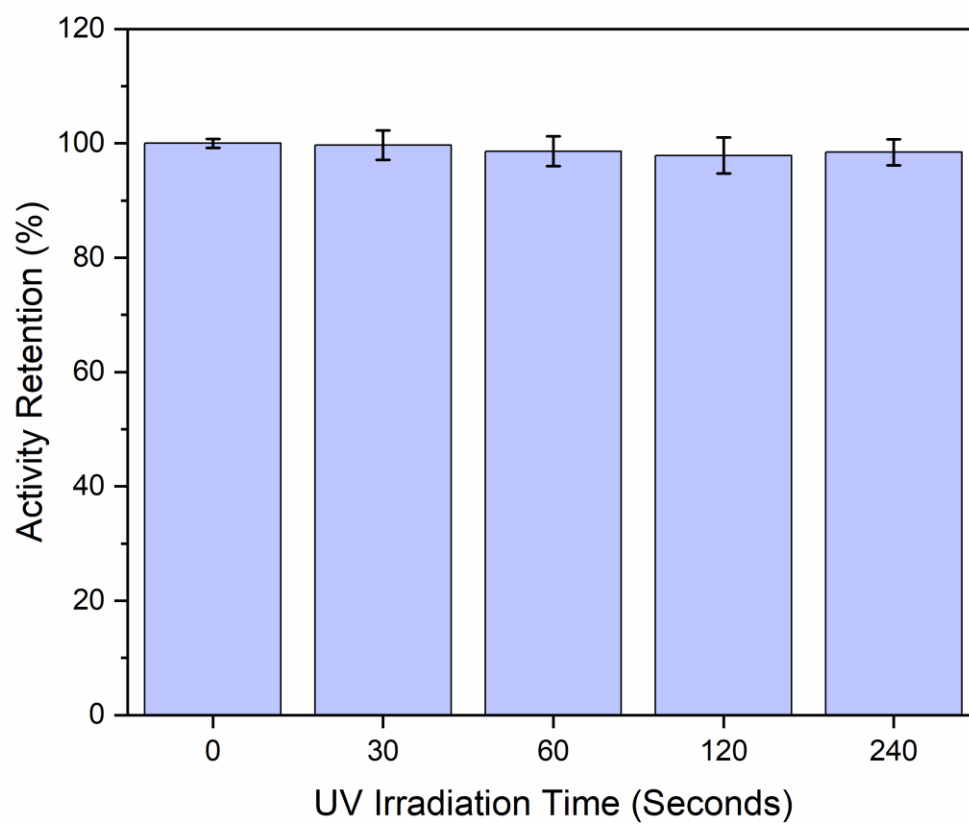

**Figure S2.** Effect of UV irradiation on dissolved NZCA enzyme activity.

**Table S1.** Statistical significance tests among immobilized NZCA of difference enzyme doses based on activity recovery on day 0.

| Comparison pair | p.adj     |
|-----------------|-----------|
| NZCA0.4-NZCA0.2 | 0.0470324 |
| NZCA0.6-NZCA0.2 | 0.0012406 |
| NZCA0.8-NZCA0.2 | 0.0071350 |
| NZCA1.0-NZCA0.2 | 0.0005196 |
| NZCA0.6-NZCA0.4 | 0.3620395 |
| NZCA0.8-NZCA0.4 | 0.8593567 |
| NZCA1.0-NZCA0.4 | 0.1801902 |
| NZCA0.8-NZCA0.6 | 0.8882249 |
| NZCA1.0-NZCA0.6 | 0.9892495 |
| NZCA1.0-NZCA0.8 | 0.6497923 |

**Table S2.** Statistical significance tests among immobilized NZCA of difference enzyme doses based on activity retention on day 150.

| Comparison pair | p.adj     |
|-----------------|-----------|
| NZCA0.4-NZCA0.2 | 0.1524637 |
| NZCA0.6-NZCA0.2 | 0.0232981 |
| NZCA0.8-NZCA0.2 | 0.1439779 |
| NZCA1.0-NZCA0.2 | 0.0388347 |
| NZCA0.6-NZCA0.4 | 0.8377666 |
| NZCA0.8-NZCA0.4 | 0.9999997 |
| NZCA1.0-NZCA0.4 | 0.9377288 |
| NZCA0.8-NZCA0.6 | 0.8532056 |
| NZCA1.0-NZCA0.6 | 0.9987245 |
| NZCA1.0-NZCA0.8 | 0.9467189 |
